# Supplementary material
Source: PubMed Central journal article supplement (PMC6460830)
Supplement: 41512_2018_34_MOESM1_ESM.pdf [file 41512_2018_34_MOESM1_ESM.pdf]

**Greenwood-Nam-D'Agostino**

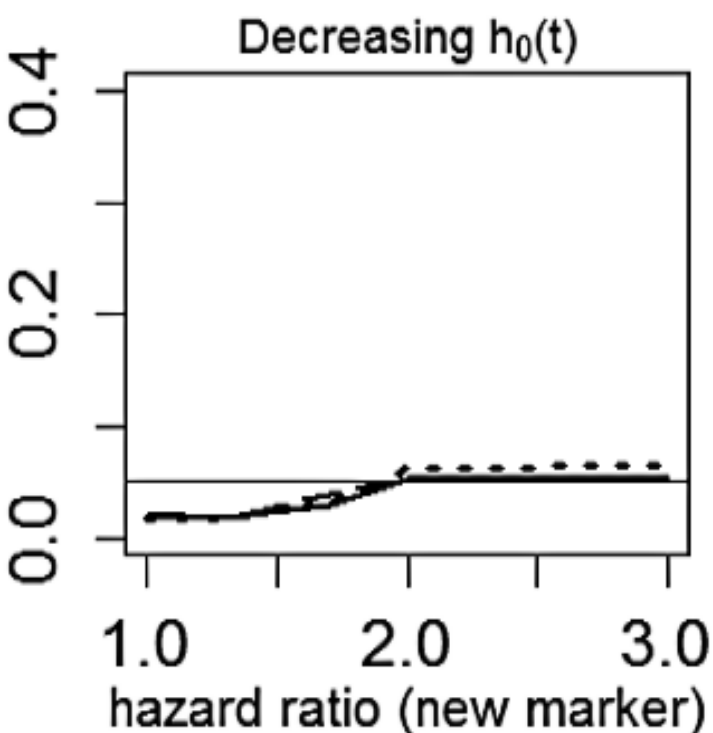

**Gronnesby-Borgan**

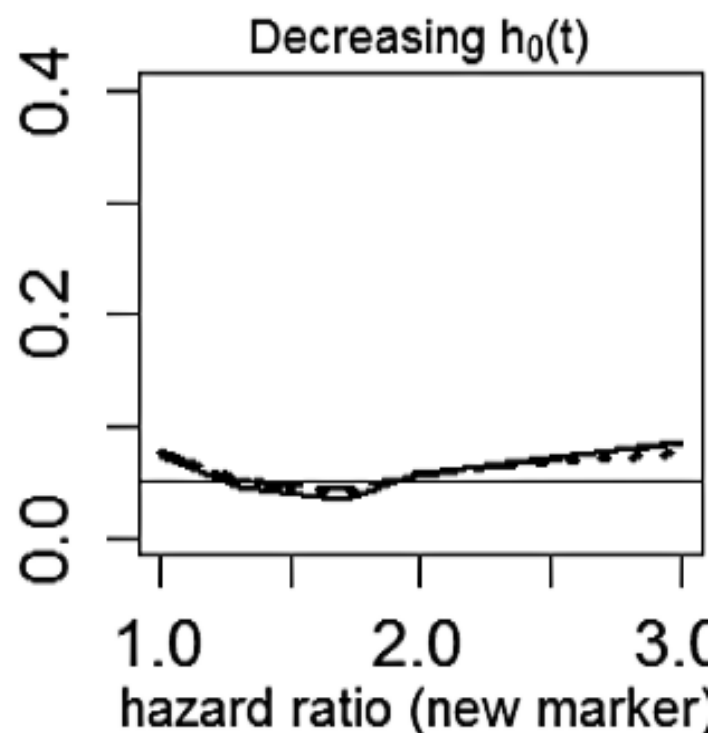

**Greenwood-Nam-D'Agostino**

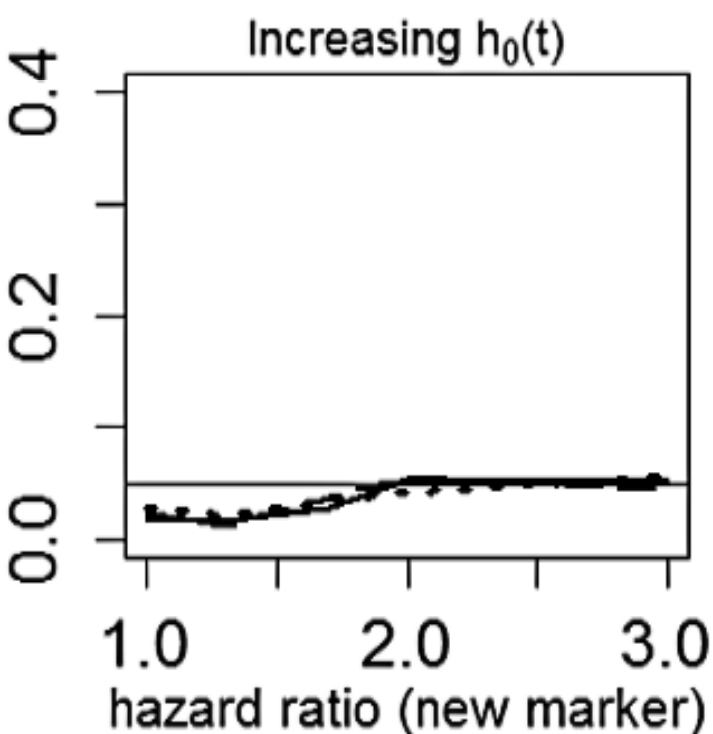

**Gronnesby-Borgan**

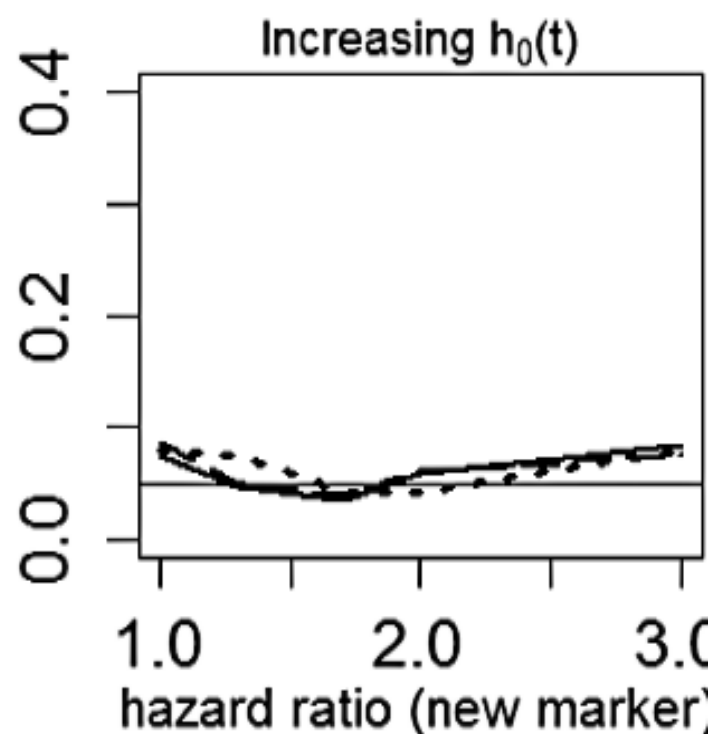

— No Censoring    - - - 25% censoring    . . . . 50% censoring
