# Supplementary material
Source: PubMed Central journal article supplement (PMC6460830)
Supplement: 41512_2018_34_MOESM2_ESM.pdf [file 41512_2018_34_MOESM2_ESM.pdf]

**RC-GND**

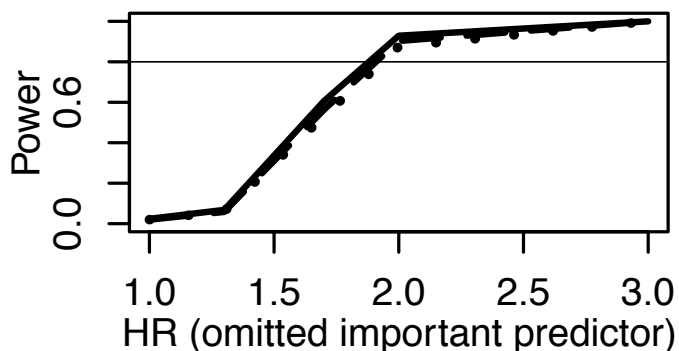

**RC-GB**

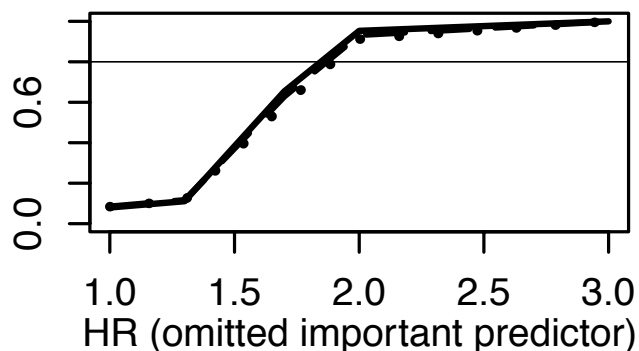

**RC-GND**

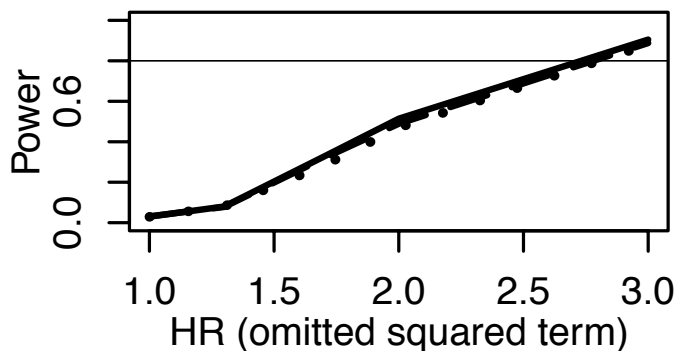

**RC-GB**

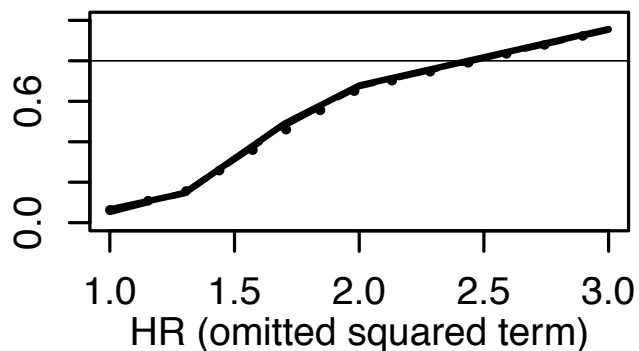

**RC-GND**

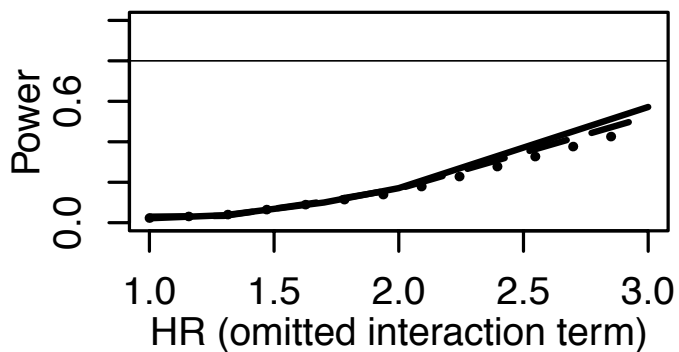

**RC-GB**

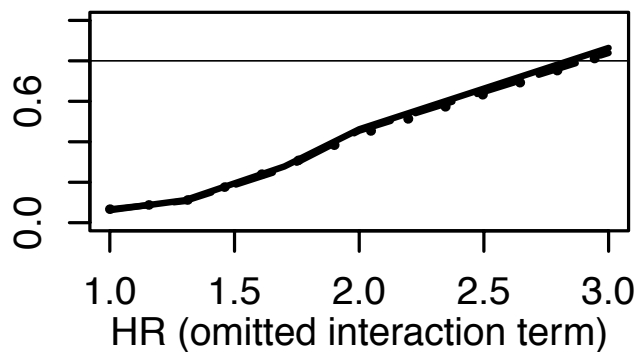

— No Censoring    - - 25% censoring    • • 50% censoring
